# Supplementary material for: Sensitizer-free photon up conversion in (HQ)2ZnCl4 and HQCl crystals: systems involving resonant energy transfer and triplet–triplet annihilation
Source: Royal Society of Chemistry journal article supplement (doi:10.1039/c9cp04435c), 2019-12-09
Supplement: c9cp04435c1.pdf [file c9cp04435c1.pdf]

## Supporting informations

**Table S1.** Crystal data and structure refinement for the hybrid compound (HQ)<sub>2</sub>[ZnCl<sub>4</sub>] and the HQCl salt.

|                                                          | (HQ) <sub>2</sub> [ZnCl <sub>4</sub> ]                                           | HQCl                                                                         |
|----------------------------------------------------------|----------------------------------------------------------------------------------|------------------------------------------------------------------------------|
| Empirical formula                                        | C <sub>18</sub> H <sub>16</sub> Cl <sub>4</sub> N <sub>2</sub> O <sub>2</sub> Zn | C <sub>9</sub> H <sub>10</sub> Cl <sub>1</sub> N <sub>1</sub> O <sub>2</sub> |
| Fw                                                       | 499.52                                                                           | 199.63                                                                       |
| Crystal colour                                           | yellow                                                                           | yellow                                                                       |
| Wavelength (Å)                                           | 0.71073                                                                          | 0.71073                                                                      |
| Temperature (K)                                          | 298                                                                              | 100                                                                          |
| Crystal system, Z                                        | Monoclinic, 4                                                                    | Triclinic, 2                                                                 |
| Space group                                              | <i>C2/c</i>                                                                      | <i>P-1</i>                                                                   |
| a (Å)                                                    | 15.2108(17)                                                                      | 7.2651(8)                                                                    |
| b (Å)                                                    | 8.1418(8)                                                                        | 8.2751(9)                                                                    |
| c (Å)                                                    | 16.7204(19)                                                                      | 8.4760(9)                                                                    |
| α (°)                                                    | 90                                                                               | 78.281(3)                                                                    |
| β (°)                                                    | 91.503(7)                                                                        | 86.099(3)                                                                    |
| γ (°)                                                    | 90                                                                               | 66.537(3)                                                                    |
| V (Å <sup>3</sup> )                                      | 2070.0(4)                                                                        | 457.65(9)                                                                    |
| ρ <sub>calc</sub> (g.cm <sup>-3</sup> )                  | 1.603                                                                            | 1.449                                                                        |
| μ(MoKα) (mm <sup>-1</sup> )                              | 1.718                                                                            | 0.381                                                                        |
| θ range (°)                                              | 2.437–32.458                                                                     | 2.454– 45.405                                                                |
| Data collected                                           | 12032                                                                            | 59879                                                                        |
| Data unique                                              | 3700                                                                             | 7659                                                                         |
| Data observed                                            | 1816                                                                             | 6366                                                                         |
| R(int)                                                   | 0.0796                                                                           | 0.0437                                                                       |
| Nb of parameters / restraints                            | 125/0                                                                            | 158/0                                                                        |
| R1 [F <sup>2</sup> > 2s(F <sup>2</sup> )], <sup>a</sup>  | 0.1186 [0.0488]                                                                  | 0.0466 [0.0339]                                                              |
| wR2 [F <sup>2</sup> > 2s(F <sup>2</sup> )], <sup>b</sup> | 0.1390 [0.1100]                                                                  | 0.1066 [0.0954]                                                              |
| S(F <sup>2</sup> ), <sup>c</sup>                         | 0.954                                                                            | 0.987                                                                        |

<sup>a</sup>R1(F) = Σ||F<sub>0</sub>| - |F<sub>C</sub>||/Σ|F<sub>0</sub>|; <sup>b</sup>wR2(F<sup>2</sup>) = [Σw(F<sub>0</sub><sup>2</sup>-F<sub>C</sub><sup>2</sup>)<sup>2</sup>/ΣwF<sub>0</sub><sup>4</sup>]<sup>1/2</sup>; <sup>c</sup>S(F<sup>2</sup>) = [Σw(F<sub>0</sub><sup>2</sup>-F<sub>C</sub><sup>2</sup>)<sup>2</sup>/(n+r-p)]<sup>1/2</sup>.

Table S2. Selected bond distances for the hybrid compound (HQ)<sub>2</sub>[ZnCl<sub>4</sub>].

| Bond        | Length (Å) |
|-------------|------------|
| Zn-Cl1      | 2.2725(8)  |
| Zn-Cl2      | 2.2654(9)  |
| N5-H5...Cl2 | 2.3444(9)  |
| O4-H4...Cl1 | 2.2846(9)  |

Table S3. Selected bond distances for the HQCl salt.

| Bond        | Length (Å) |
|-------------|------------|
| O1-H8...Ow1 | 1.70(3)    |
| C1-H2...Cl  | 2.74(1)    |
| C1-H2...Cl  | 2.91(2)    |
| N1-H1...Cl  | 2.36(1)    |
| C9-H5...Ow  | 2.59(1)    |
| C3-H4...Cl  | 2.74(2)    |

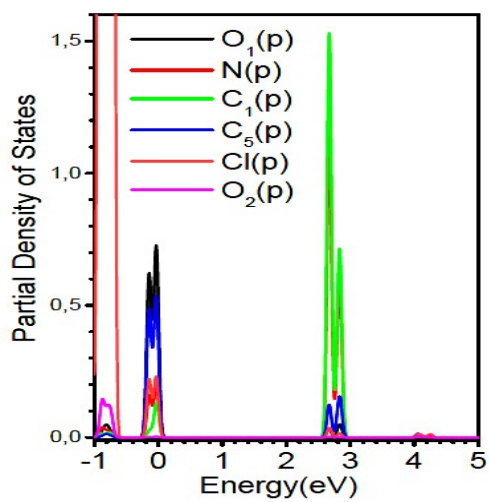

Figure S1. Calculated electronic density of states of (HQ.Cl) salt.
